# Supplementary material
Source: HighWire-hosted journal article supplement (http://molpharm.aspetjournals.org/highwire/filestream/76315/field_highwire_adjunct_files/1/FigureS1_8D3_reduced.pdf)
Supplement: FigureS1_8D3_reduced.pdf [file FigureS1_8D3_reduced.pdf]

## **In vivo labeling of brain capillary endothelial cells following intravenous injection of monoclonal antibodies targeting the transferrin receptor**

Sarah Paris-Robidas, B.Sc., Vincent Emond, Ph.D., Cyntia Tremblay, M.Sc., Denis Soulet, Ph.D., and Frédéric Calon, B.Pharm., Ph.D.

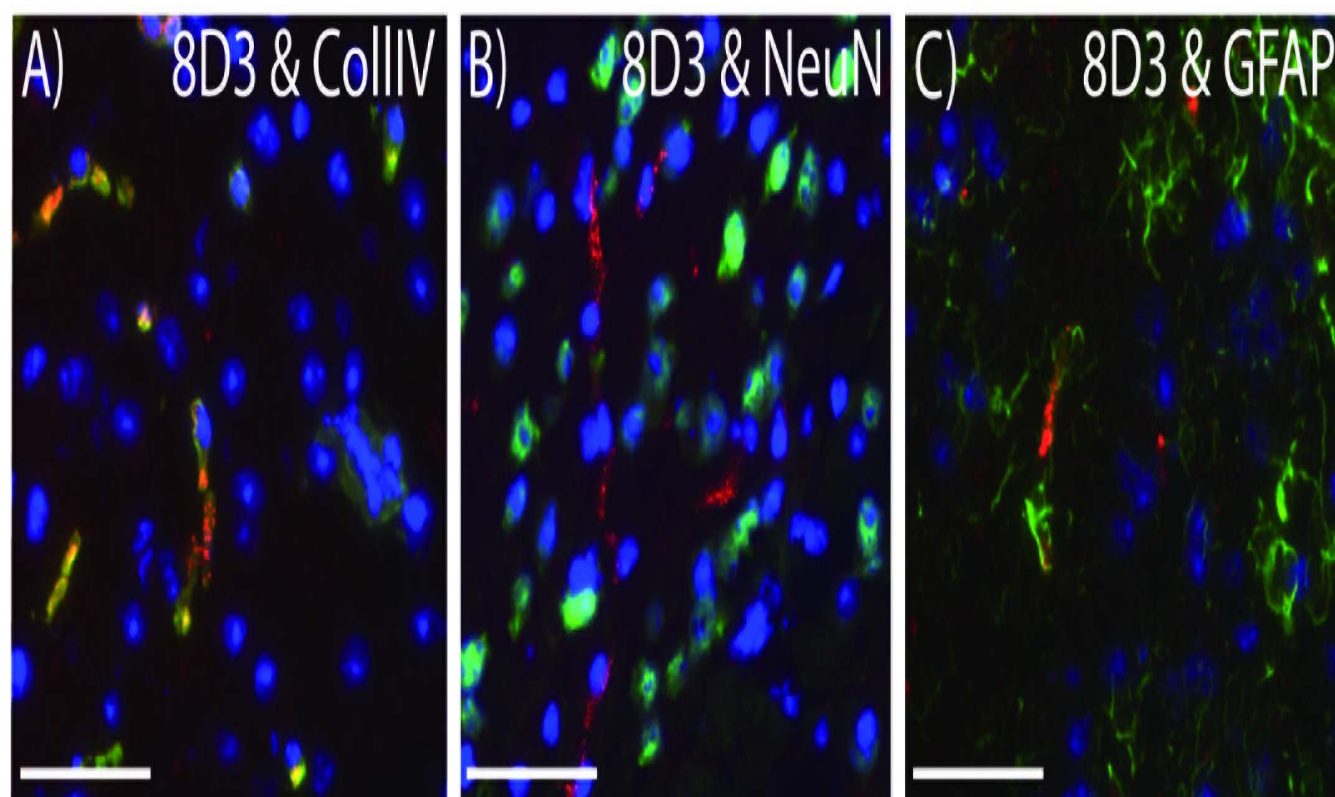

**Figure S1. Intravenously injected 8D3 MAbs specifically labeled brain microvessels after intravenous injection.** Mice were injected with AF568-labeled MAbs targeting the TfR (8D3) (n=3) and euthanized 1 h after the injection. (A) AF568-signal in red was present only in the brain of mice injected with 8D3 MAbs targeting TfR and restricted to microvessels identified using a collagen IV marker (green). No signal was detected with AF568-labeled control IgG. No evidence of colocalization outside microvessels was found using (B) neuronal marker NeuN (green) and (C) astrocytes marker GFAP (green). Nuclei were counterstained with DAPI (blue). Scale bar = 50  $\mu\text{m}$
